# Supplementary material
Source: publisher site journal article supplement (https://www.spandidos-publications.com/4478/downloadSupplementary)

Figure S1. Expression of cytokines secreted by the cell lines RWPE-1, 22Rv1, LNCaP and DU-145. Data show as concentration pg/ml.

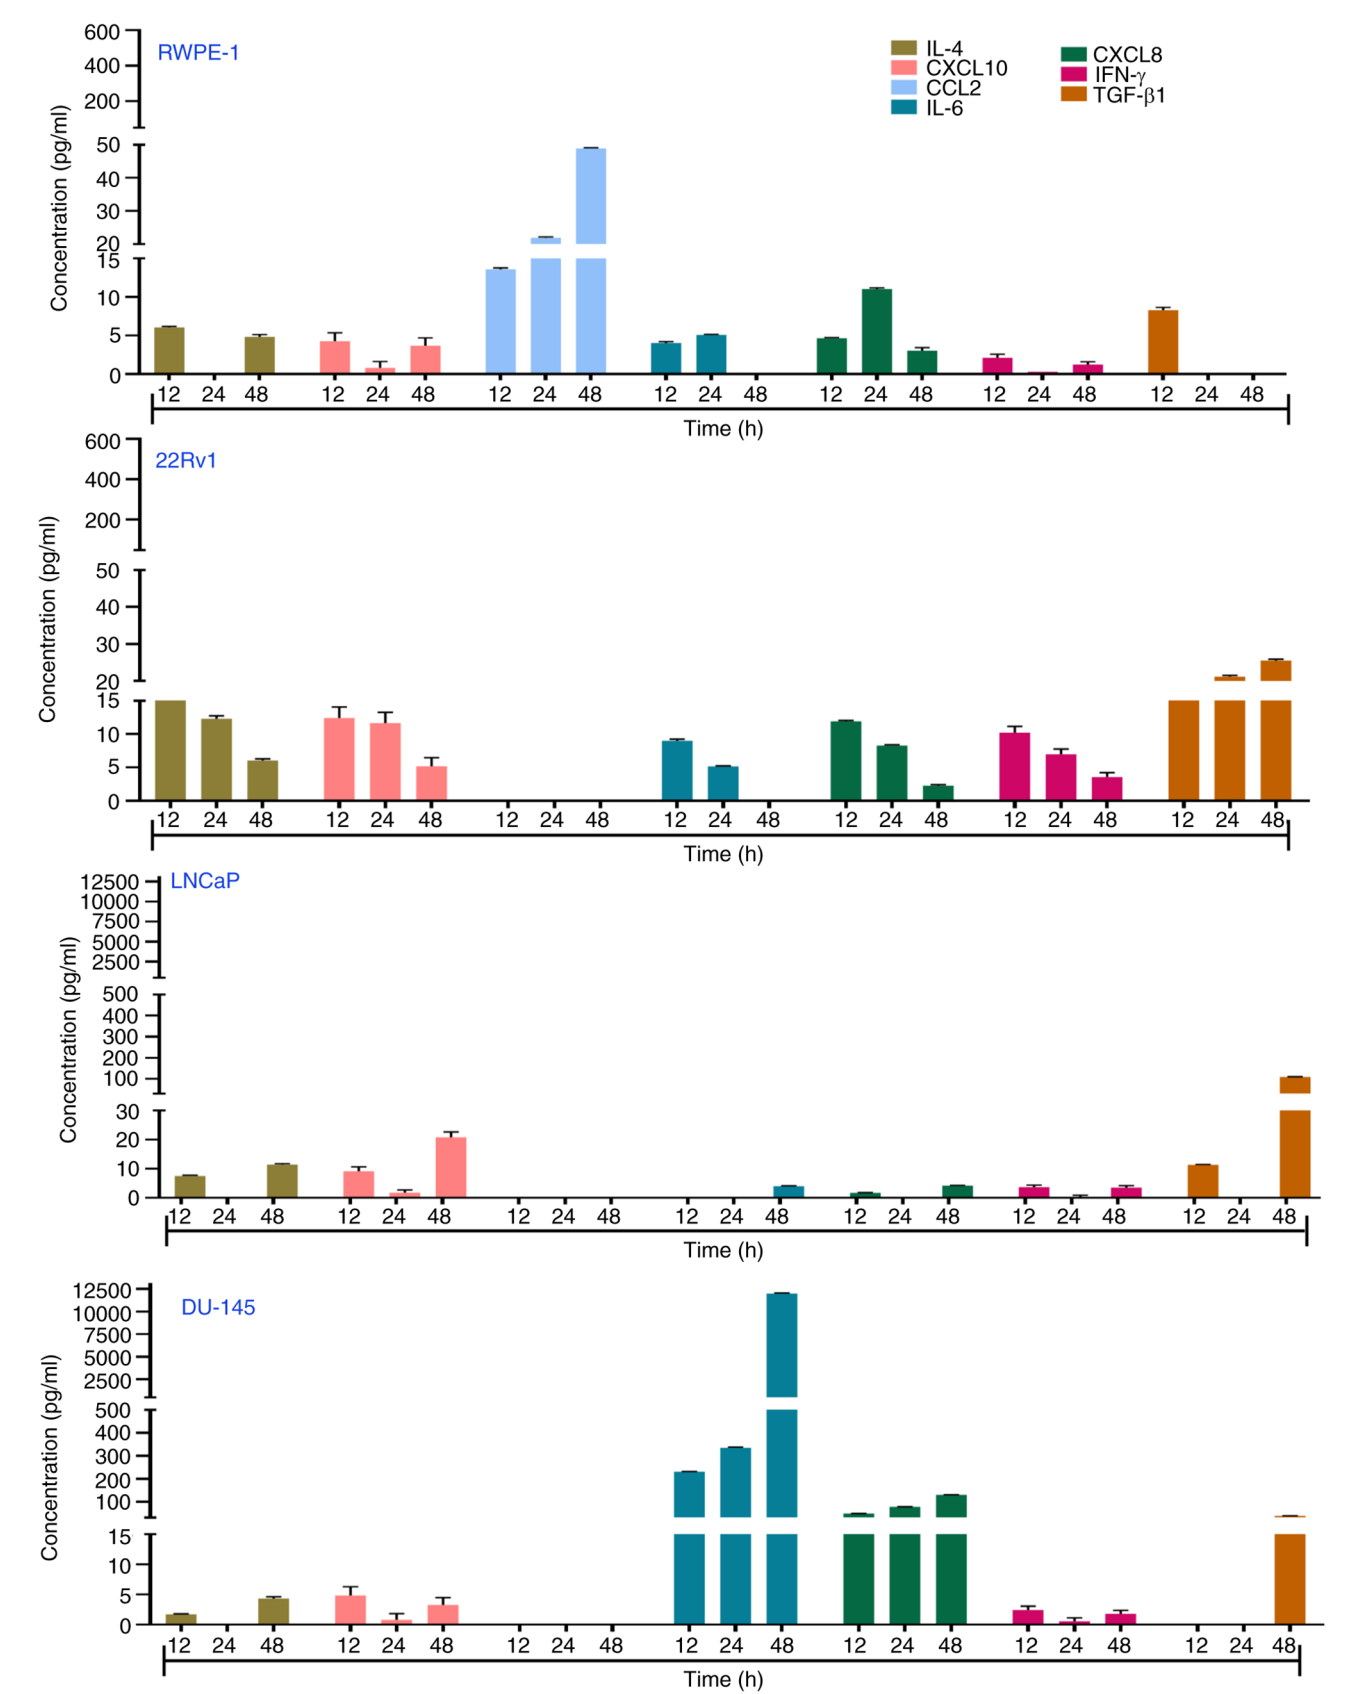

Figure S2. Expression of growth factors secreted by the cell lines RWPE-1, 22Rv1, LNCaP and DU-145. Data show as concentration pg/ml.

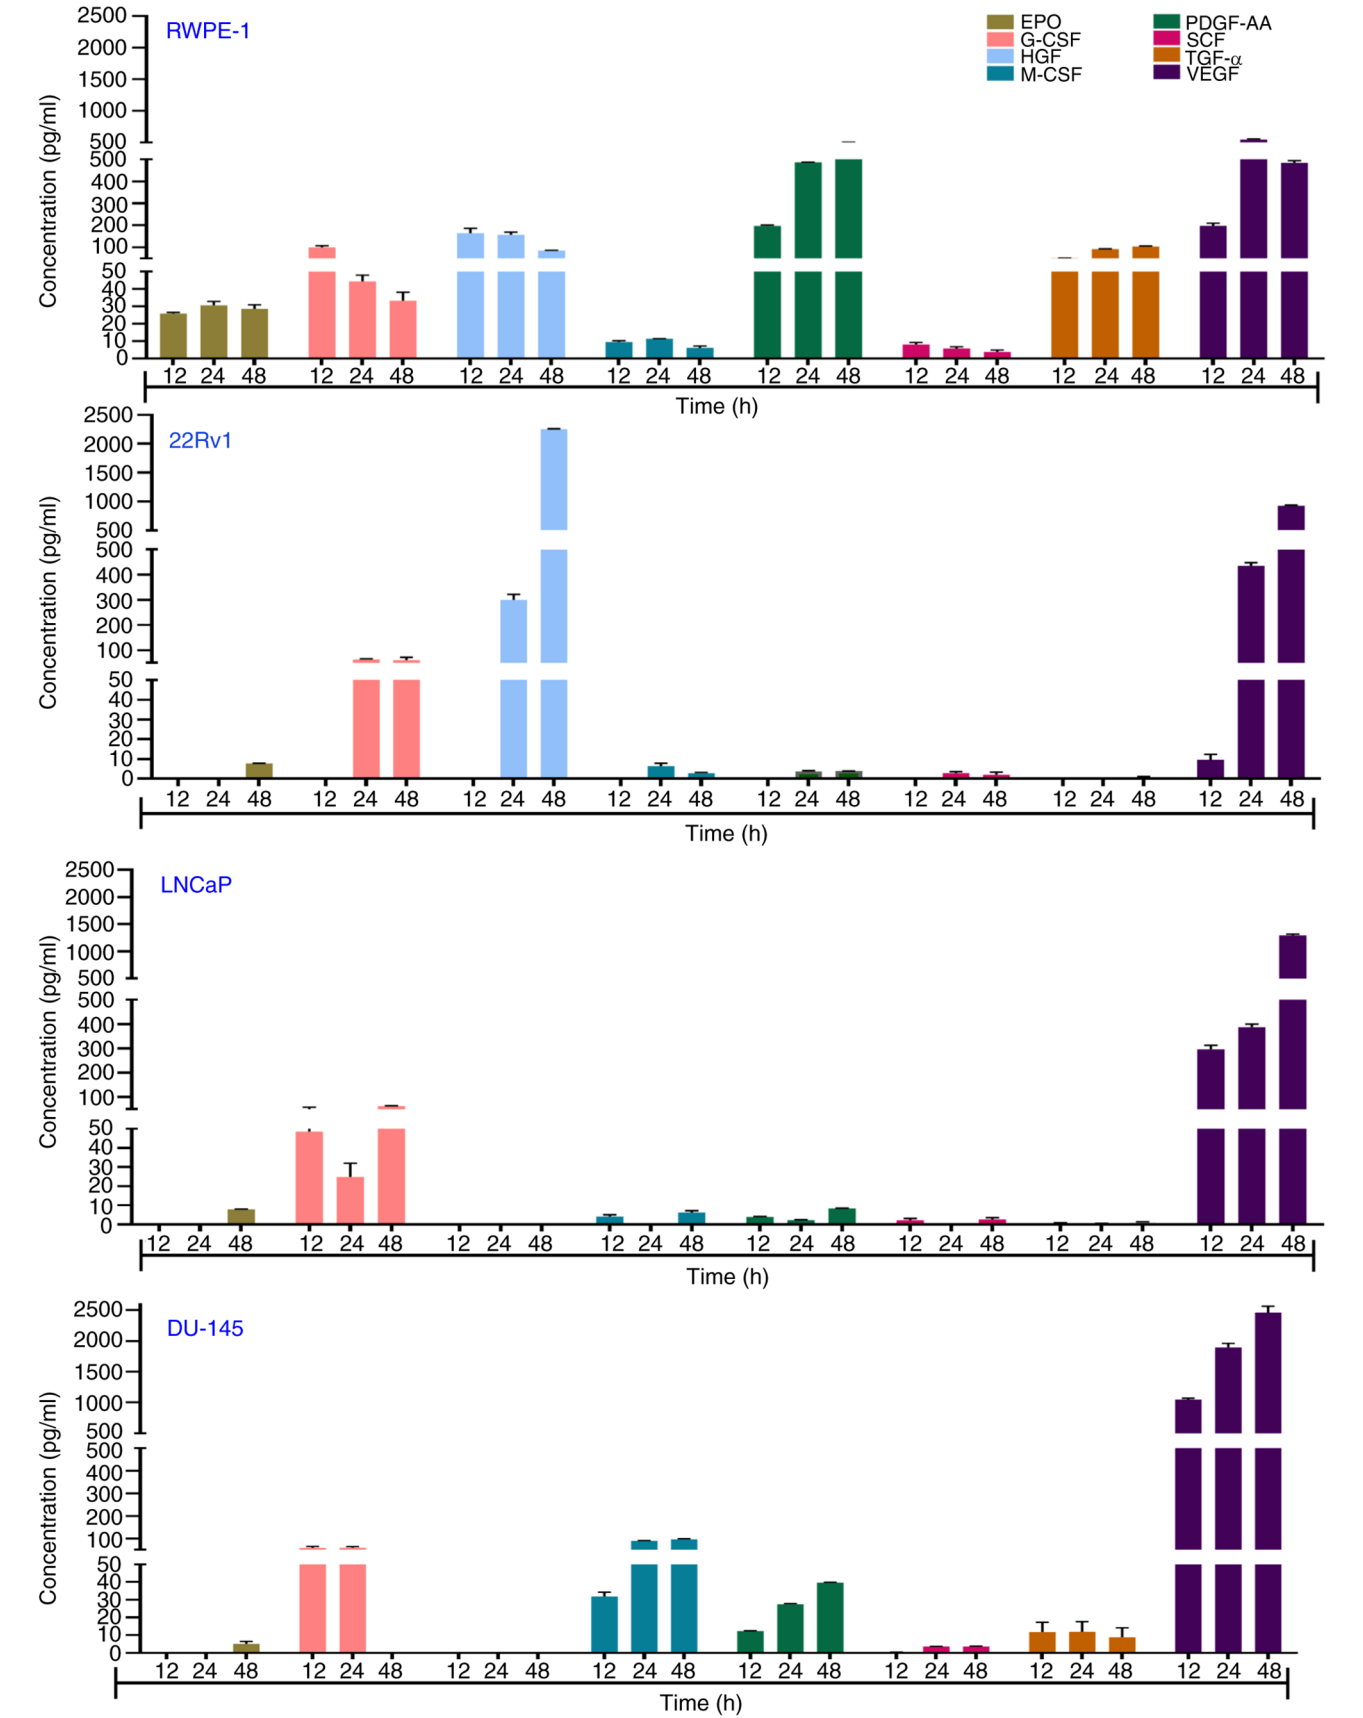

Supplement: Supplementary file [file downloadSupplementary]
